# Supplementary material
Source: publisher figshare collection journal article supplement (https://sage.figshare.com/ndownloader/files/23101580)
Supplement: Supplementary file 1 [file 23101580]

**APPENDIX TABLES**

**APPENDIX TABLE 1: Robustness check - weekly recall period for on- farm production diversity**

|  | HDDS1 | MDDW2 |
| --- | --- | --- |
|  | 7 day | 7 day |
| Past year - Any pulses grown? | 0.26*** | 0.25** |
|  | (0.10) | (0.12) |
| Past year - Any veg grown? | 0.06 | 0.09 |
|  | (0.09) | (0.11) |
| Does HH3 have kitchen garden? | 0.27** | 0.36*** |
|  | (0.12) | (0.12) |
| Does HH3 have Livestock? | 0.04 | 0.15** |
|  | (0.06) | (0.06) |
| IW4 aware about nutrition | 0.11 | 0.05 |
|  | (0.10) | (0.14) |
| =1 if IW4 literate | 0.37*** | 0.35*** |
|  | (0.07) | (0.08) |
| IW4 Age in completed years | 0.01 | 0.02 |
|  | (0.01) | (0.02) |
| IW4 age squared | -0.00 | -0.00 |
|  | (0.00) | (0.00) |
| HH3 accessed PDS in last month | -0.00 | -0.01** |
|  | (0.00) | (0.00) |
| HH3 size | 0.03** | 0.04** |
|  | (0.01) | (0.02) |
| ST dummy | -0.15 | -0.14 |
|  | (0.10) | (0.11) |
| SC dummy | -0.19** | -0.15 |
|  | (0.09) | (0.10) |
| Dalit dummy | 0.05 | 0.06 |
|  | (0.15) | (0.18) |
| HH3 cereal expenditure5 (in 1000 Rs.) | -0.03 | -0.02 |
|  | (0.02) | (0.02) |
| HH3 pulses expenditure5 (in 1000 Rs.) | 0.04** | 0.06** |
|  | (0.02) | (0.03) |
| HH3 dairy expenditure5 (in 1000 Rs.) | 0.51*** | 0.54*** |
|  | (0.09) | (0.13) |
| HH3 fruit/veg expenditure5 (in 1000 Rs.) | 0.03* | 0.02 |
|  | (0.02) | (0.02) |
| HH3 Meat/Fish expenditure5 (in 1000 Rs.) | 0.12 | 0.11 |
|  | (0.07) | (0.10) |
|  |  |  |
| Observations | 3,595 | 3,595 |
| R-squared | 0.26 | 0.32 |

*1 HDDS refers to the 11-point Household Dietary Diversity Score. 2 MDDW refers to the 10-point Minimum Dietary Diversity for Women score. 3HH refers to household. 4IW refers to Index Woman. 5 Expenditure refers to monthly household expenditure on a given food group. All specifications include the constant term. Village fixed effects, and the standard errors are clustered at the village level. Significance levels: *** p< 0.01, ** p< 0.05, * p< 0.1*

**APPENDIX TABLE 2: Robustness check - Poisson regression Marginal Effects (instead of OLS) for on- farm production diversity**

|  | (1) | (2) | (3) | (4) |
| --- | --- | --- | --- | --- |
|  | HDDS1 | MDDW2 | HDDS1 | MDDW2 |
| VARIABLES | 24 hour | 24 hour | 7 day | 7 day |
|  |  |  |  |  |
| Past year - Any pulses grown? | 0.04** | 0.06*** | 0.04*** | 0.04** |
|  | (0.02) | (0.02) | (0.01) | (0.02) |
| Past year - Any veg grown? | 0.02 | 0.00 | 0.01 | 0.02 |
|  | (0.02) | (0.02) | (0.01) | (0.02) |
| Does HH3 have kitchen garden? | 0.02 | 0.03 | 0.04** | 0.06*** |
|  | (0.02) | (0.03) | (0.02) | (0.02) |
| Does HH3 have Livestock? | 0.07*** | 0.11*** | 0.01 | 0.01 |
|  | (0.02) | (0.03) | (0.01) | (0.02) |
| IW4 aware about nutrition | 0.03** | 0.03* | 0.05*** | 0.06*** |
|  | (0.01) | (0.02) | (0.01) | (0.01) |
| =1 if IW4 literate | 0.00 | 0.03* | 0.00 | 0.02** |
|  | (0.01) | (0.01) | (0.01) | (0.01) |
| IW4 Age in completed years | 0.00 | 0.00 | 0.00 | 0.00 |
|  | (0.00) | (0.00) | (0.00) | (0.00) |
| HH3 accessed PDS in last month | 0.00 | -0.00 | -0.00 | -0.00** |
|  | (0.00) | (0.00) | (0.00) | (0.00) |
| HH3 size | 0.01*** | 0.01** | 0.00** | 0.01*** |
|  | (0.00) | (0.00) | (0.00) | (0.00) |
| ST dummy | 0.00 | -0.02 | -0.02 | -0.02 |
|  | (0.02) | (0.03) | (0.01) | (0.02) |
| SC dummy | -0.02 | -0.04 | -0.03** | -0.02 |
|  | (0.02) | (0.03) | (0.01) | (0.02) |
| Dalit dummy | -0.01 | -0.05 | 0.01 | 0.01 |
|  | (0.02) | (0.03) | (0.02) | (0.03) |
| HH3 cereal expenditure5 (in 1000 Rs.) | -0.01* | -0.01* | -0.00 | -0.00 |
|  | (0.00) | (0.01) | (0) | (0) |
| HH3 pulses expenditure5 (in 1000 Rs.) | 0.01** | 0.02** | 0.00 | 0.00 |
|  | (0.00) | (0.01) | (0.01) | (0.01) |
| HH3 dairy expenditure5 (in 1000 Rs.) | 0.07*** | 0.08*** | 0.06*** | 0.08*** |
|  | (0.01) | (0.02) | (0.01) | (0.02) |
| HH3 fruit/veg expenditure5 (in 1000 Rs.) | 0.01* | 0.01 | 0.00** | 0.00 |
|  | (0.01) | (0.01) | (0.00) | (0.00) |
| HH3 Meat/Fish expenditure5 (in 1000 Rs.) | 0.01 | 0.02 | 0.01 | 0.01 |
|  | (0.01) | (0.02) | (0.01) | (0.01) |
|  |  |  |  |  |
| Observations | 3,595 | 3,595 | 3,595 | 3,595 |
| R-Squared | 0.26 | 0.31 | 0.27 | 0.32 |

*1 HDDS refers to the 11-point Household Dietary Diversity Score. 2 MDDW refers to the 10-point Minimum Dietary Diversity for Women score. 3IW refers to Index Woman. 4HH refers to household. 5 Expenditure refers to monthly household expenditure on a given food group. All specifications include the constant term. Village fixed effects, and the standard errors are clustered at the village level. Significance levels: *** p< 0.01, ** p< 0.05, * p< 0.10*
